# Supplementary material for: Finerenone, a Non-Steroidal Mineralocorticoid Receptor Antagonist, Reduces Vascular Injury and Increases Regulatory T-Cells: Studies in Rodents with Diabetic and Neovascular Retinopathy
Source: Int J Mol Sci. 2023 Jan 25;24(3):2334. doi: 10.3390/ijms24032334 (PMC9917037; doi:10.3390/ijms24032334)
Supplement: Supplementary file 1 [file ijms-24-02334-s001.zip › ijms-2095819-supplementary.pdf]

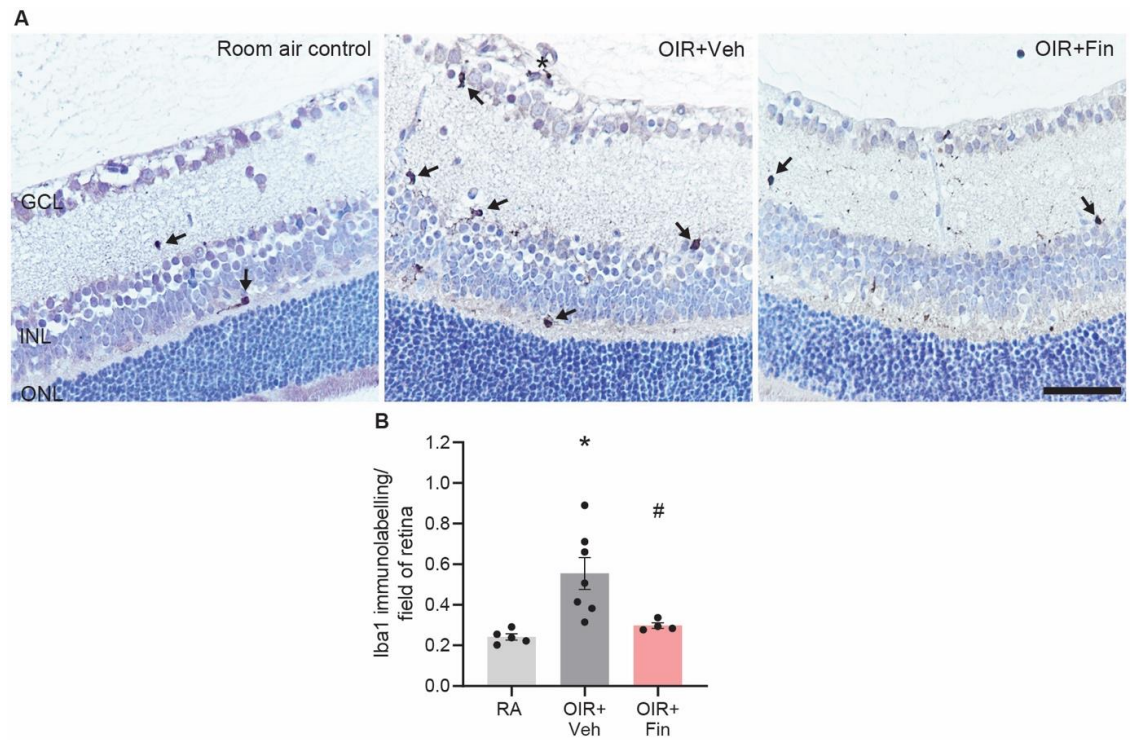

**Figure S1.** Finerenone reduced microglia/macrophage density in retina of mice with OIR at post-natal day 18. RA, room air control. Veh, vehicle. Fin, finerenone. GCL, ganglion cell layer. INL, inner nuclear layer. ONL, outer nuclear layer. A. Three  $\mu\text{m}$  paraffin sections of retina immunolabeled with Iba1 to detect microglia/macrophages. Counterstain, hematoxylin. Scale bar = 50  $\mu\text{m}$ . Iba1 labelled microglia/macrophages are denoted by arrows. Neovascular tufts are denoted by an asterisk. B. Iba1 quantitation. \* $p < 0.05$  vs room air control. # $p < 0.05$  to OIR+vehicle (Welch's and Brown-Forsythe ANOVA).  $n = 4$  to 7 mice per group. Values are mean  $\pm$  SEM.

| Group            | n  | Body Weight      |
|------------------|----|------------------|
| Room air control | 19 | 8.2 $\pm$ 0.89   |
| OIR + vehicle    | 20 | 7.3 $\pm$ 0.59** |
| OIR + finerenone | 14 | 7.4 $\pm$ 0.49** |

**Table S1.** Body weight of OIR mice at postnatal day 18. \*\* $p < 0.01$  to room air controls (Welch's and Brown-Forsythe ANOVA).  $n = 14$  to 20 Foxp3<sup>rtP</sup> mice from 3 litters per group. Values are mean  $\pm$  SEM.

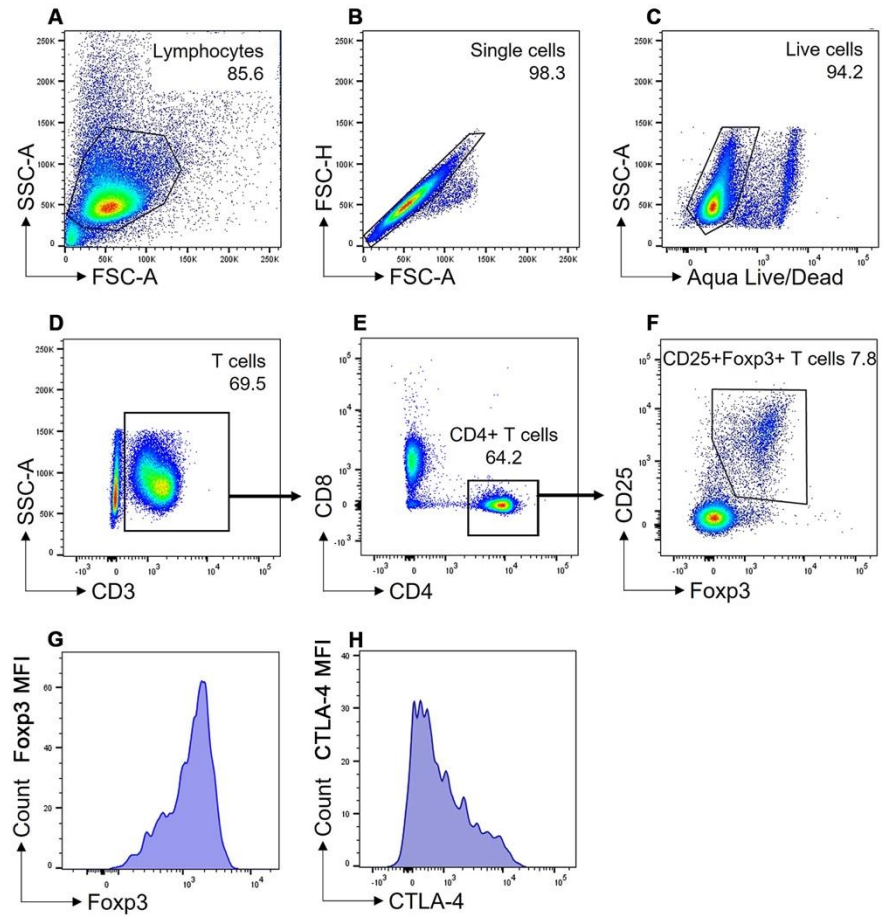

**Figure S2.** Gating strategy to identify Foxp3<sup>+</sup> Tregs with flow cytometry in the spleen of mice. SSC, side scatter. FSC, forward scatter. MFI, mean fluorescence intensity. (**A**). Lymphocytes. (**B and C**). Duplets and dead cells were eliminated from the lymphocyte population. (**D and E**). CD3<sup>+</sup> T cells and CD4<sup>+</sup> T cells were selected. (**F**). From this population CD25<sup>+</sup> Foxp3<sup>+</sup> T cells were selected to analyze the presence of Foxp3 and CTLA-4. (**G**). Foxp3 MFI of Tregs. (**H**). CTLA-4 MFI of Foxp3<sup>+</sup> Tregs.
